# Supplementary material
Source: PubMed Central journal article supplement (PMC3406153)
Supplement: AEM.00432-12_zam999103535so1.pdf [file AEM.00432-12_zam999103535so1.pdf]

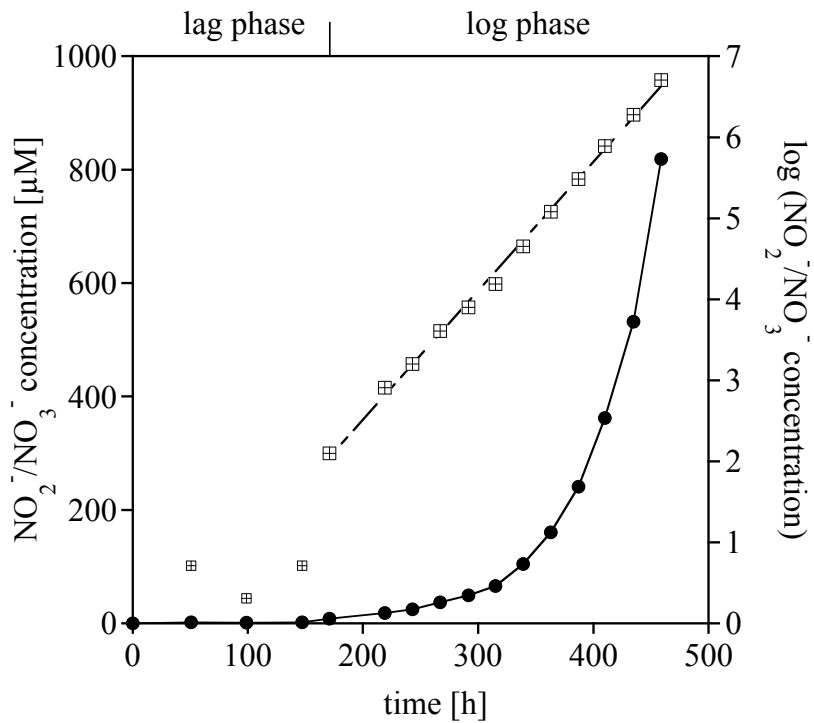

**FIGURE S1:** NO<sub>2</sub><sup>-</sup>/NO<sub>3</sub><sup>-</sup> concentration and log (NO<sub>2</sub><sup>-</sup>/NO<sub>3</sub><sup>-</sup> concentration) in an enrichment culture over time. The growth rate of the culture is calculated as the linear increase of the log transformed the NO<sub>2</sub><sup>-</sup>/NO<sub>3</sub><sup>-</sup> concentration over time. The lag phase was determined as the time before the culture started to grow logarithmic.

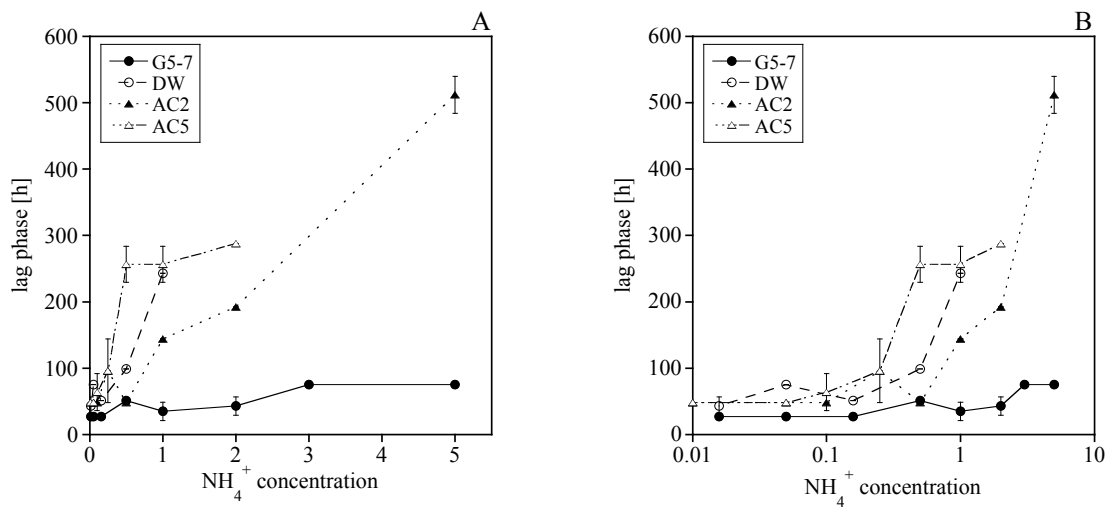

**FIGURE S2:** Influence of  $\text{NH}_4^+$  concentration on the lag phase before onset of logarithmic growth in the enrichment cultures AOA-AC2; AOA-AC5, AOA-DW, and AOB-G5-7 (mean  $\pm$  SD; n=3). A:  $\text{NH}_4^+$  concentration linear scale; B:  $\text{NH}_4^+$  concentration logarithmic scale.

**TABLE S1:** Primers and PCR conditions used in this study.

|                          | Primer                                                                                                                                                                                                 | Anneal. temp | # cycles |
|--------------------------|--------------------------------------------------------------------------------------------------------------------------------------------------------------------------------------------------------|--------------|----------|
| AOA-amoA (5)             | Arch amoA F:<br>5'-STA ATG GTC TGG CTT AGA CG-3'<br>Arch amoA R:<br>5'-GCG GCC ATC CAT CTG TAT GT-3'                                                                                                   | 53           | 35       |
| Archaeal 16S rRNA (4, 6) | Arch 109F:<br>5'-ACK GCT CAG TAA CAC GT-3'<br>Arch 915R:<br>5'-YCC GGC GTT GAM TCC AAT T-3'                                                                                                            | 46           | 30       |
| AOB-amoA (10)            | amoA-1F:<br>5'-GGG GTT TCT ACT GGT GGT-3'<br>amoA-2R KS:<br>5'-CCC CTC KGS AAA GCC TTC TTC-3'                                                                                                          | 55           | 35       |
| AOB-16S rRNA (7)         | CTO 189F-A:<br>5'-GGA GAA AAG CAG GGG ATC G-3'<br>CTO 189F-B:<br>5'-GGA GGA AAG CAG GGG ATC G-3'<br>CTO 189F-C:<br>5'-GGA GGA AAG TAG GGG ATC G-3'<br>CTO 654R:<br>5'-CTA GCY TTG TAG TTT CAA ACG C-3' | 57.5         | 35       |
| M13-cloning              | M13-F: 5'-GTA AAA CGA CGG CCA G-3'<br>M13-R: 5'-CAG GAA ACA GCT ATG AC-3'                                                                                                                              | 50           | 30       |

**TABLE S2:** Oligonucleotide probes used for CARD-FISH

| Probe                    | Sequence (5'-3')                                             | Reference |
|--------------------------|--------------------------------------------------------------|-----------|
| Eub338I (Bacteria)       | GCTGCCTCCCGTAGGAGT                                           | (1)       |
| Eub338II (Bacteria)      | GCAGCCACCCGTAGGTGT                                           | (2)       |
| Eub338III (Bacteria)     | GCTGCCACCCGTAGGTGT                                           | (2)       |
| Cren 554 (Crenarchaeota) | TTAGGCCCAATAATCMTTCCT                                        | (8)       |
| Ntspa712 (Nitrospira)    | CGCCTTCGCCACCGCCTTCC<br>Competitor:<br>CGCCTTCGCCACCGGTGTTCC | (3)       |
| AOB NSO1225              | CGCCATTGTATTACGTGTGA                                         | (9)       |
| AOB NSO156               | TATTAGCACATCTTTCGAT                                          | (9)       |

**TABLE S3:** Influence of the  $\text{NH}_4^+$  concentration on the growth rates [ $\text{h}^{-1}$ ] of the enrichment culture AOA-AC2, AOA-AC5, AOA-DW and AOB-G5-7 (data are similar to data in Figure 2) (mean  $\pm$  SD, n=3; different letters behind values indicate significant differences between values determined by one-way ANOVA followed by Tukey test;  $P < 0.05$ ).

| $\text{NH}_4^+$<br>[mM] | AOA-AC2                         | AOA-AC5                          | AOA-DW                         | AOB-G5-7                        |
|-------------------------|---------------------------------|----------------------------------|--------------------------------|---------------------------------|
| 0.01                    | 0.020 $\pm$ 0.002 <sup>a</sup>  | 0.023 $\pm$ 0.003 <sup>a</sup>   |                                |                                 |
| 0.0158                  |                                 |                                  | 0.023 $\pm$ 0.003 <sup>a</sup> | 0.030 $\pm$ 0.002 <sup>a</sup>  |
| 0.05                    | 0.019 $\pm$ 0.001 <sup>ab</sup> | 0.021 $\pm$ 0.000 <sup>ab</sup>  | 0.017 $\pm$ 0.000 <sup>b</sup> | 0.042 $\pm$ 0.000 <sup>b</sup>  |
| 0.1                     | 0.017 $\pm$ 0.000 <sup>ab</sup> | 0.020 $\pm$ 0.001 <sup>bcd</sup> |                                |                                 |
| 0.158                   |                                 |                                  | 0.017 $\pm$ 0.000 <sup>b</sup> | 0.051 $\pm$ 0.004 <sup>bc</sup> |
| 0.25                    | 0.017 $\pm$ 0.001 <sup>ab</sup> | 0.020 $\pm$ 0.001 <sup>abc</sup> |                                |                                 |
| 0.5                     | 0.017 $\pm$ 0.002 <sup>ab</sup> | 0.018 $\pm$ 0.001 <sup>bcd</sup> | 0.016 $\pm$ 0.000 <sup>b</sup> | 0.057 $\pm$ 0.005 <sup>cd</sup> |
| 1                       | 0.017 $\pm$ 0.001 <sup>ab</sup> | 0.020 $\pm$ 0.001 <sup>ab</sup>  | 0.016 $\pm$ 0.000 <sup>b</sup> | 0.059 $\pm$ 0.003 <sup>cd</sup> |
| 2                       | 0.015 $\pm$ 0.002 <sup>b</sup>  | 0.016 $\pm$ 0.001 <sup>cd</sup>  |                                | 0.060 $\pm$ 0.005 <sup>cd</sup> |
| 3                       |                                 |                                  |                                | 0.065 $\pm$ 0.004 <sup>d</sup>  |
| 5                       |                                 | 0.016 $\pm$ 0.000 <sup>d</sup>   |                                | 0.061 $\pm$ 0.003 <sup>d</sup>  |

**TABLE S4:** Influence of  $\text{NH}_4^+$  concentration on the lag phase [h] before onset of logarithmic growth in the enrichment cultures AOA-AC2; AOA-AC5, AOA-DW, and AOB-G5-7 (data are similar to data in Figure S3; mean  $\pm$  SD, n=3; different letters behind values indicate significant differences between values determined by one-way ANOVA followed by Tukey test;  $P < 0.05$ ).

| $\text{NH}_4^+$<br>[mM] | AOA-AC2                       | AOA-AC5                       | AOA-DW                       | AOB-G5-7                      |
|-------------------------|-------------------------------|-------------------------------|------------------------------|-------------------------------|
| 0.01                    | 48.0 $\pm$ 0.0 <sup>a</sup>   | 48.0 $\pm$ 0.0 <sup>a</sup>   |                              |                               |
| 0.0158                  |                               |                               | 43.0 $\pm$ 13.9 <sup>a</sup> | 27.0 $\pm$ 0.0 <sup>a</sup>   |
| 0.05                    | 48.0 $\pm$ 0.0 <sup>a</sup>   | 48.0 $\pm$ 0.0 <sup>a</sup>   | 75.5 $\pm$ 0.0 <sup>a</sup>  | 27.0 $\pm$ 0.0 <sup>a</sup>   |
| 0.1                     | 64.0 $\pm$ 27.7 <sup>a</sup>  | 48.0 $\pm$ 0.0 <sup>a</sup>   |                              |                               |
| 0.158                   |                               |                               | 51.0 $\pm$ 0.0 <sup>b</sup>  | 27.0 $\pm$ 0.0 <sup>a</sup>   |
| 0.25                    | 96.0 $\pm$ 0.0 <sup>a</sup>   | 96.0 $\pm$ 0.0 <sup>ab</sup>  |                              |                               |
| 0.5                     | 256.5 $\pm$ 27.3 <sup>b</sup> | 48.0 $\pm$ 0.0 <sup>a</sup>   | 99.0 $\pm$ 0.0 <sup>c</sup>  | 51.0 $\pm$ 0.0 <sup>b</sup>   |
| 1                       | 256.5 $\pm$ 27.3 <sup>b</sup> | 144.0 $\pm$ 0.0 <sup>bc</sup> | 243.0 $\pm$ 0.0 <sup>d</sup> | 35.0 $\pm$ 13.9 <sup>ab</sup> |
| 2                       | 288.0 $\pm$ 0.0 <sup>b</sup>  | 192.0 $\pm$ 0.0 <sup>c</sup>  |                              | 43.0 $\pm$ 13.9 <sup>ab</sup> |
| 3                       |                               |                               |                              | 75.5 $\pm$ 0.0 <sup>c</sup>   |
| 5                       |                               | 512.0 $\pm$ 27.7 <sup>d</sup> |                              | 75.5 $\pm$ 0.0 <sup>c</sup>   |

**TABLE S5:** Influence of the calculated O<sub>2</sub> concentrations in the headspace of the bottle on the growth rates [h<sup>-1</sup>] of the enrichment cultures AOA-AC2, AOA-AC5, AOA-DW, and AOB-G5-7 (data are similar to data in Figure 3; mean ± SD, n=3; different letters behind values indicate significant differences between values determined by one-way ANOVA followed by Tukey test; P < 0.05).

| O <sub>2</sub> [%] | AC2                         | AC5                         | DW                         | G5-7                       |
|--------------------|-----------------------------|-----------------------------|----------------------------|----------------------------|
| 0.5                | 0.000 ± 0.000 <sup>a</sup>  | 0.005 ± 0.000 <sup>a</sup>  | 0.014 ± 0.004 <sup>a</sup> | 0.010 ± 0.000 <sup>a</sup> |
| 1                  | 0.008 ± 0.001 <sup>b</sup>  | 0.008 ± 0.000 <sup>b</sup>  | 0.016 ± 0.000 <sup>a</sup> | 0.018 ± 0.001 <sup>b</sup> |
| 2                  | 0.011 ± 0.001 <sup>bc</sup> | 0.009 ± 0.001 <sup>c</sup>  | 0.015 ± 0.001 <sup>a</sup> | 0.031 ± 0.003 <sup>c</sup> |
| 21                 | 0.013 ± 0.001 <sup>c</sup>  | 0.008 ± 0.000 <sup>bc</sup> | 0.019 ± 0.003 <sup>a</sup> | 0.045 ± 0.002 <sup>d</sup> |

**TABLE S6:** Influence of the pH value on the growth rates [ $h^{-1}$ ] of the enrichment cultures AOA-AC2, AOA-AC5, AOA-DW, and AOB-G5-7 (data are similar to data in Figure 4; mean  $\pm$  SD, n=3; different letters behind values indicate significant differences between values determined by one-way ANOVA followed by Tukey test;  $P < 0.05$ ).

| pH  | AC2                             | AC5                              | DW                              | G5-7                           |
|-----|---------------------------------|----------------------------------|---------------------------------|--------------------------------|
| 6   | 0.000 $\pm$ 0.000 <sup>a</sup>  | 0.010 $\pm$ 0.000 <sup>ab</sup>  | 0.017 $\pm$ 0.001 <sup>a</sup>  | 0.034 $\pm$ 0.003 <sup>a</sup> |
| 6.5 | 0.011 $\pm$ 0.001 <sup>bc</sup> | 0.011 $\pm$ 0.001 <sup>abc</sup> | 0.018 $\pm$ 0.001 <sup>ad</sup> | 0.046 $\pm$ 0.004 <sup>b</sup> |
| 7   | 0.013 $\pm$ 0.000 <sup>d</sup>  | 0.013 $\pm$ 0.001 <sup>c</sup>   | 0.024 $\pm$ 0.000 <sup>b</sup>  | 0.049 $\pm$ 0.000 <sup>b</sup> |
| 7.5 | 0.012 $\pm$ 0.000 <sup>cd</sup> | 0.011 $\pm$ 0.001 <sup>abc</sup> | 0.022 $\pm$ 0.001 <sup>bc</sup> | 0.051 $\pm$ 0.004 <sup>b</sup> |
| 8   | 0.010 $\pm$ 0.000 <sup>b</sup>  | 0.012 $\pm$ 0.000 <sup>bc</sup>  | 0.020 $\pm$ 0.002 <sup>cd</sup> | 0.047 $\pm$ 0.005 <sup>b</sup> |
| 8.5 | 0.005 $\pm$ 0.000 <sup>e</sup>  | 0.008 $\pm$ 0.000 <sup>a</sup>   | 0.020 $\pm$ 0.001 <sup>cd</sup> | 0.025 $\pm$ 0.001 <sup>c</sup> |
| 9   | 0.006 $\pm$ 0.000 <sup>e</sup>  | 0.010 $\pm$ 0.002 <sup>ab</sup>  | 0.020 $\pm$ 0.001 <sup>cd</sup> | 0.018 $\pm$ 0.001 <sup>c</sup> |



**TABLE S7:** Influence of white, red, and blue light with the intensity of 30  $\mu\text{mol photons m}^{-2} \text{s}^{-1}$  and blue light with the intensity of 3  $\mu\text{mol photons m}^{-2} \text{s}^{-1}$  on the growth rates [ $\text{h}^{-1}$ ] of the enrichment cultures AOB-G5-7 (data are similar to data in Figure 5; mean  $\pm$  SD, n=3; different letters behind values indicate significant differences between values determined by one-way ANOVA followed by Tukey test;  $P < 0.05$ ).

| G5-7          | white                          | red                            | blue                           | blue<br>low intensity           |
|---------------|--------------------------------|--------------------------------|--------------------------------|---------------------------------|
| light         | 0.056 $\pm$ 0.001 <sup>a</sup> | 0.051 $\pm$ 0.005 <sup>a</sup> | 0.000 $\pm$ 0.000 <sup>a</sup> | 0.057 $\pm$ 0.004 <sup>a</sup>  |
| light -> dark | 0.056 $\pm$ 0.004 <sup>a</sup> | 0.047 $\pm$ 0.002 <sup>a</sup> | 0.051 $\pm$ 0.002 <sup>b</sup> | 0.068 $\pm$ 0.004 <sup>b</sup>  |
| dark -> light | 0.058 $\pm$ 0.001 <sup>a</sup> | 0.049 $\pm$ 0.002 <sup>a</sup> | 0.064 $\pm$ 0.004 <sup>c</sup> | 0.055 $\pm$ 0.002 <sup>a</sup>  |
| dark          | 0.055 $\pm$ 0.001 <sup>a</sup> | 0.045 $\pm$ 0.002 <sup>a</sup> | 0.066 $\pm$ 0.004 <sup>c</sup> | 0.063 $\pm$ 0.003 <sup>ab</sup> |

**TABLE S8:** Influence of white, red, and blue light with the intensity of 30  $\mu\text{mol photons m}^{-2} \text{s}^{-1}$  and blue light with the intensity of 3  $\mu\text{mol photons m}^{-2} \text{s}^{-1}$  on the growth rates [ $\text{h}^{-1}$ ] of the enrichment cultures AOA-DW (data are similar to data in Figure 5; mean  $\pm$  SD, n=3; different letters behind values indicate significant differences between values determined by one-way ANOVA followed by Tukey test;  $P < 0.05$ ).

|               | white                          | red                            | blue                           | blue<br>low intensity           |
|---------------|--------------------------------|--------------------------------|--------------------------------|---------------------------------|
| light         | 0.000 $\pm$ 0.000 <sup>a</sup> | 0.012 $\pm$ 0.000 <sup>a</sup> | 0.000 $\pm$ 0.000 <sup>a</sup> | 0.011 $\pm$ 0.001 <sup>a</sup>  |
| light -> dark | 0.000 $\pm$ 0.000 <sup>a</sup> | 0.012 $\pm$ 0.001 <sup>a</sup> | 0.000 $\pm$ 0.000 <sup>a</sup> | 0.013 $\pm$ 0.001 <sup>bc</sup> |
| dark -> light | 0.018 $\pm$ 0.000 <sup>b</sup> | 0.018 $\pm$ 0.001 <sup>b</sup> | 0.018 $\pm$ 0.001 <sup>b</sup> | 0.012 $\pm$ 0.001 <sup>ab</sup> |
| dark          | 0.017 $\pm$ 0.001 <sup>b</sup> | 0.016 $\pm$ 0.000 <sup>c</sup> | 0.020 $\pm$ 0.000 <sup>c</sup> | 0.015 $\pm$ 0.001 <sup>c</sup>  |

## References:

1. **Amann, R. I., B. J. Binder, R. J. Olson, S. W. Chisholm, R. Devereux and D. A. Stahl.** 1990. Combination of 16S ribosomal-RNA targeted oligonucleotide probes with flow-cytometry for analyzing mixed microbial populations. *Appl. Environ. Microbiol.* **56**:1919-1925.
2. **Daims, H., A. Bruhl, R. Amann, K.-H. Schleifer and M. Wagner.** 1999. The domain-specific probe EUB338 is insufficient for the detection of all bacteria: Development and evaluation of a more comprehensive probe set. *Syst. Appl. Microbiol.* **22**:434-444.
3. **Daims, H., J. L. Nielsen, P. H. Nielsen, K.-H. Schleifer and M. Wagner.** 2001. In situ characterization of *Nitrospira*-like nitrite-oxidizing bacteria active in wastewater treatment plants. *Appl. Environ. Microbiol.* **67**:5273-5284.
4. **DeLong, E. F.** 1992. Archaea in costal marine environments. *Proc. Natl. Acad. Sci.* **89**:5685-5689.
5. **Francis, C. A., K. J. Roberts, J. M. Beman, A. E. Santoro and B. B. Oakley.** 2005. Ubiquity and diversity of ammonia-oxidizing archaea in water columns and sediments of the ocean. *Proc. Natl. Acad. Sci.* **102**:14683-14688.
6. **Grosskopf, R. P. H. Janssen, and W. Liesack.** 1998. Diversity and structure of the methanogenic community in anoxic rice paddy soil microcosms as examined by cultivation and direct 16S rRNA gene sequence retrieval. *Appl. Environ. Microbiol.* **64**: 960-969.
7. **Kowalchuk, G. A., J. R. Stephen, W. DeBoer, J. I. Prosser, T. M. Embley and J. W. Woldendorp.** 1997. Analysis of ammonia-oxidizing bacteria of the beta subdivision of the class *Proteobacteria* in coastal sand dunes by denaturing gradient gel electrophoresis

and sequencing of PCR-amplified 16S ribosomal DNA fragments. Appl. Environ. Microbiol. **63**:1489-1497.

8. **Massana, R., A. E. Murray, C. M. Preston and E. F. DeLong.** 1997. Vertical distribution and phylogenetic characterization of marine planktonic Archaea in the Santa Barbara Channel. Appl. Environ. Microbiol. **63**:50-56.
9. **Mobarry, B. K., M. Wagner, V. Urbain, B. E. Rittmann and D. A. Stahl.** 1996. Phylogenetic probes for analyzing abundance and spatial organization of nitrifying bacteria. Appl. Environ. Microbiol. **62**:2156-2162.
10. **Rotthauwe, J. H., K. P. Witzel and W. Liesack.** 1997. The ammonia monooxygenase structural gene *amoA* as a functional marker: Molecular fine-scale analysis of natural ammonia-oxidizing populations. Appl. Environ. Microbiol. **63**:4704-4712.
